# Supplementary material
Source: PubMed Central journal article supplement (PMC3606642)
Supplement: NIHMS430742-supplement-1_si_001.pdf [file NIHMS430742-supplement-1_si_001.pdf]

## Supporting Information for

### **Antiproliferative Withanolides from *Datura wrightii***

Huaping Zhang,<sup>†</sup> Joseph Bazzill,<sup>‡</sup> Robert J. Gallagher,<sup>†</sup> Chitra Subramanian,<sup>‡</sup> Patrick T. Grogan,<sup>‡</sup>

|| Victor W. Day,<sup>§</sup> Mark S. Cohen,<sup>‡</sup> Kelly Kindscher,<sup>⊥</sup> and Barbara N. Timmermann<sup>\*,†</sup>

<sup>†</sup> *Department of Medicinal Chemistry, School of Pharmacy, University of Kansas, Lawrence, KS 66045, USA*

<sup>‡</sup> *Division of Endocrine Surgery, Department of Surgery, University of Michigan Hospital and Health Systems, Ann Arbor, MI 48109, USA*

|| *Department of Pharmacology, School of Medicine, University of Kansas Medical Center, Kansas City, KS 66160, USA*

<sup>§</sup> *The Small-Molecule X-ray Crystallography Laboratory, University of Kansas, Lawrence, KS 66047, USA*

<sup>⊥</sup> *Kansas Biological Survey, University of Kansas, Lawrence, Kansas 66047, USA*

\* Corresponding Author. Tel: +01-785-864-4844. Fax: +01-785-864-5326. E-mail address:

[btimmer@ku.edu](mailto:btimmer@ku.edu) (B. N. T.)

Special Issue in Honor of Lester A. Mitscher

## Table of Contents

**S0** Structures of withanolides **1-5** isolated from *Datura wrightii*

**S1(a)**  $^1\text{H}$  NMR spectrum of withawrightolide (**1**) in  $\text{CDCl}_3$  (500 MHz)

**S1(b)**  $^{13}\text{C}$  APT spectrum of withawrightolide (**1**) (125 MHz)

**S1(c)**  $^1\text{H}$ - $^1\text{H}$  COSY spectrum of withawrightolide (**1**)

**S1(d)** HSQC spectrum of withawrightolide (**1**)

**S1(e)** HMBC spectrum of withawrightolide (**1**)

**S1(f)** ROESY spectrum of withawrightolide (**1**)

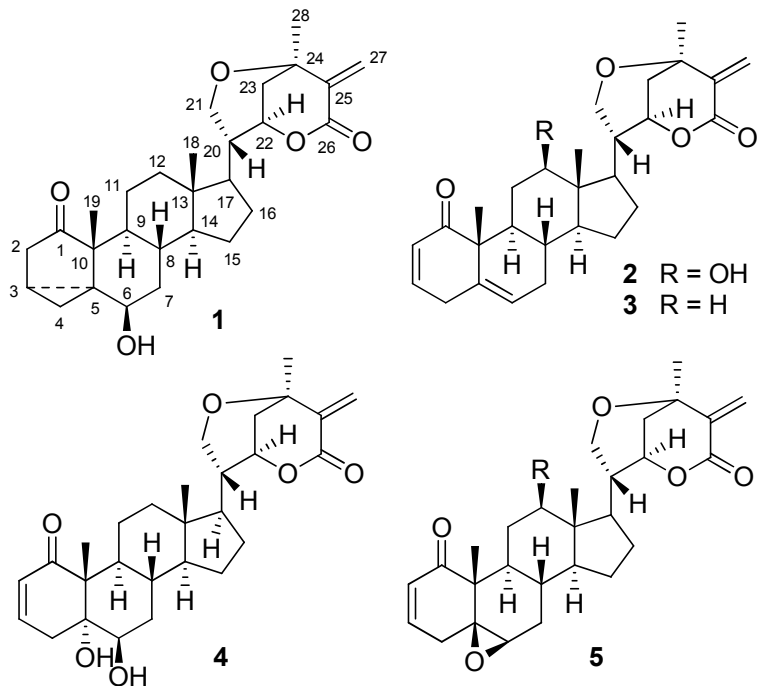

**S0** Structures of withanolides **1-5** isolated from *Datura wrightii*

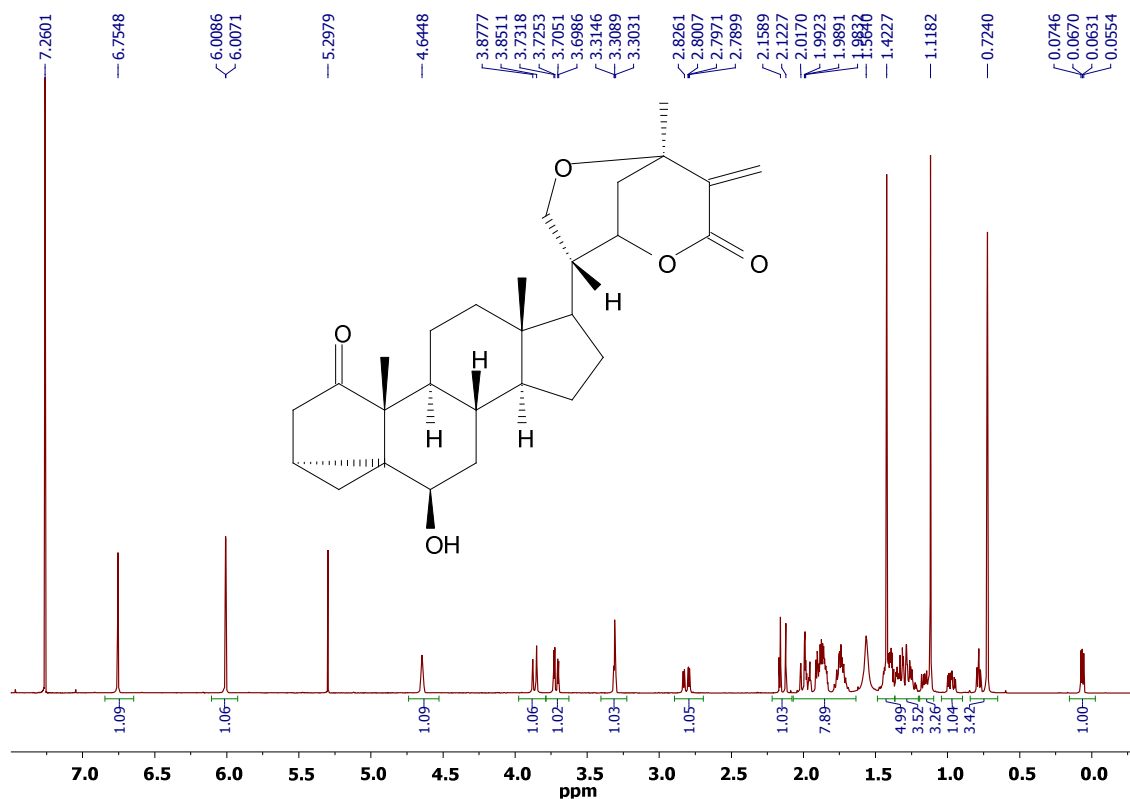

**S1(a)**  $^1\text{H}$  NMR spectrum of withawrightolide (**1**) in  $\text{CDCl}_3$  (500 MHz)

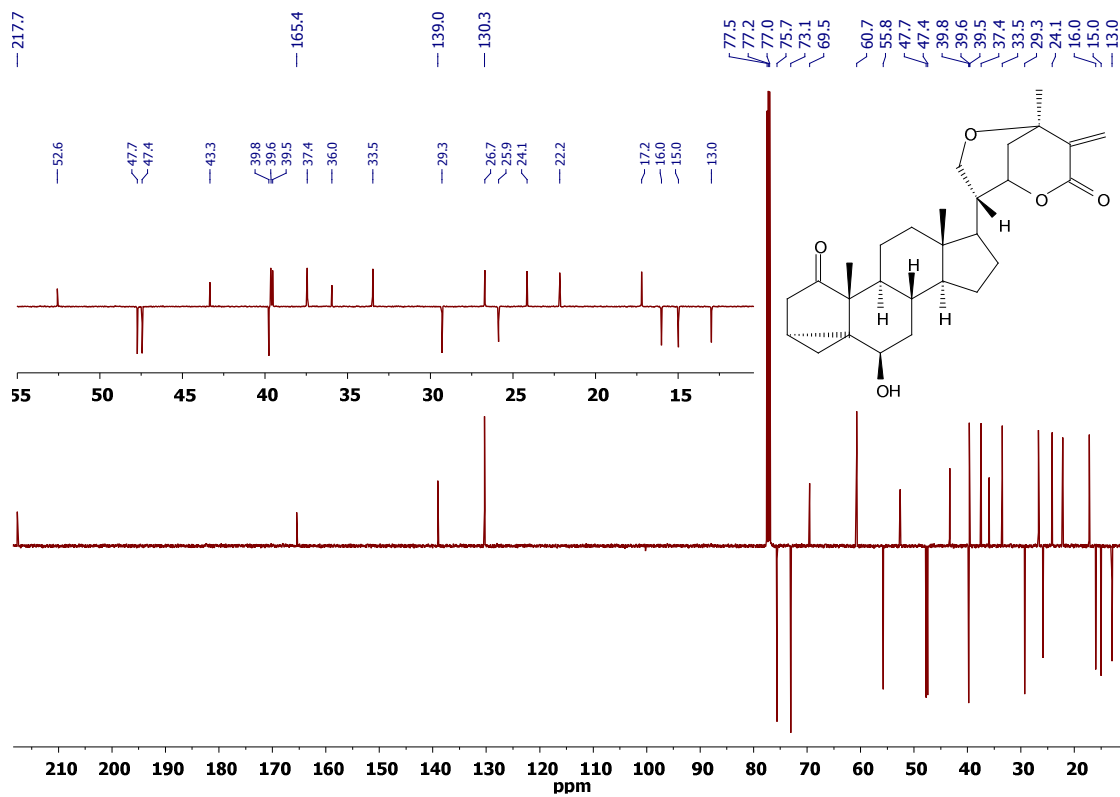

**S1(b)**  $^{13}\text{C}$  APT spectrum of withawrightolide (1) (125 MHz)

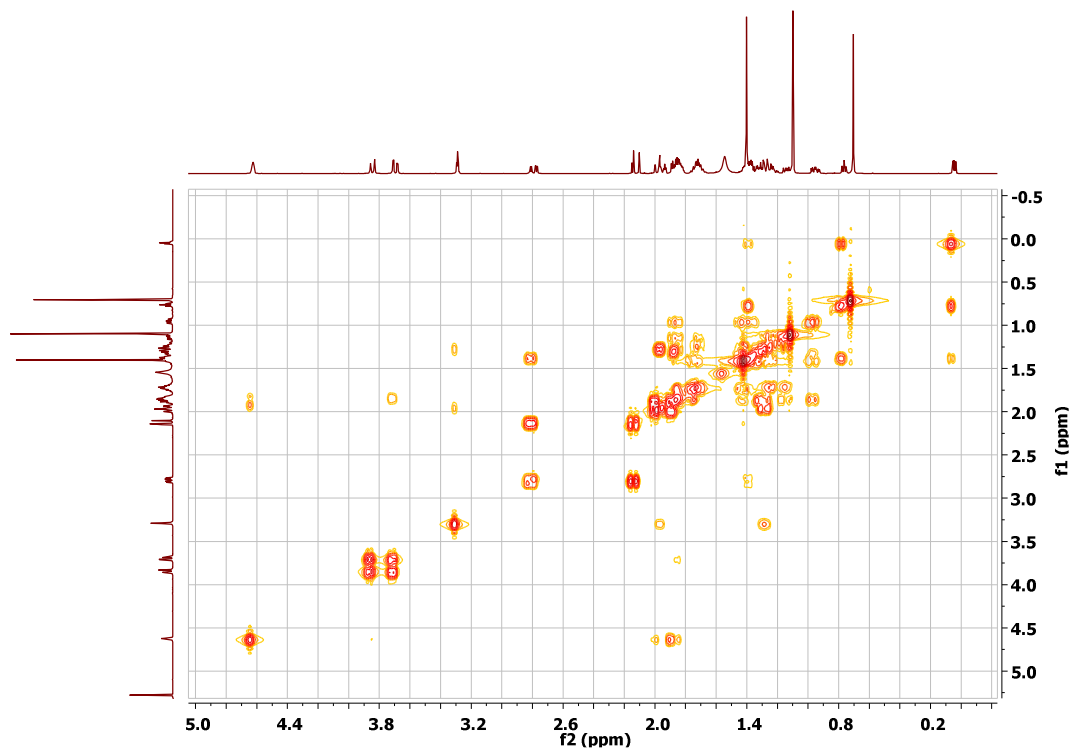

**S1(c)**  $^1\text{H}$ - $^1\text{H}$  COSY spectrum of withawrightolide (1)

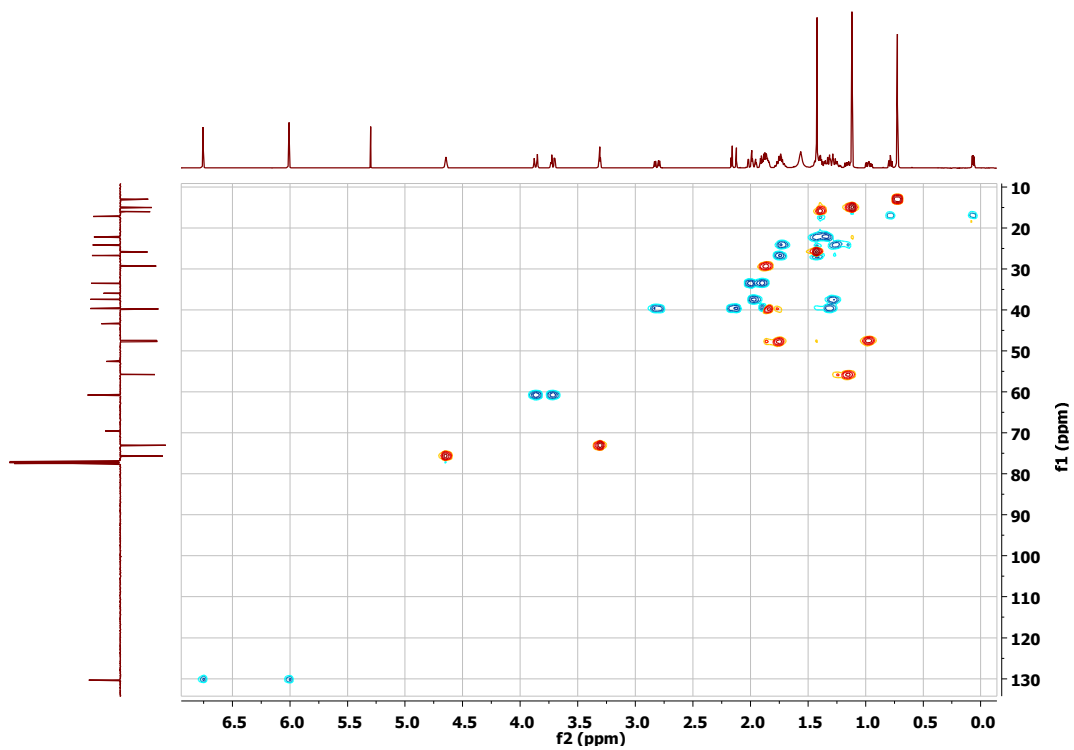

S1(d) HSQC spectrum of withawrightolide (1)

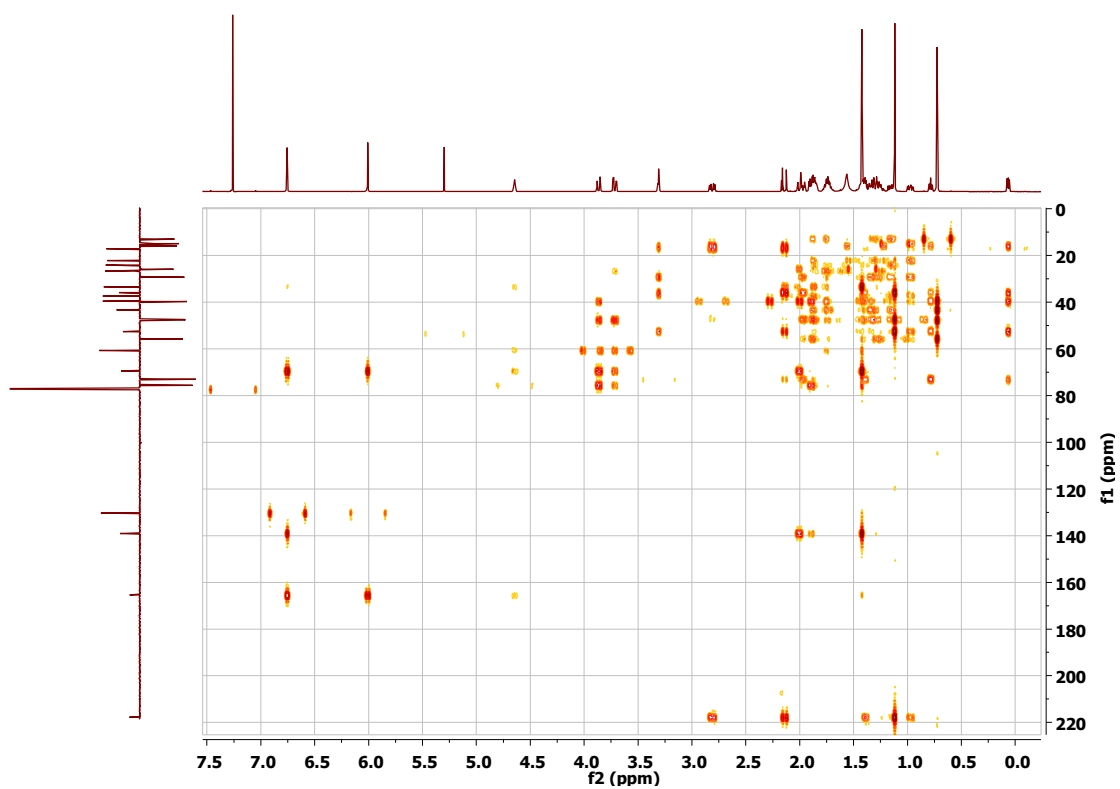

S1(e) HMBC spectrum of withawrightolide (1)

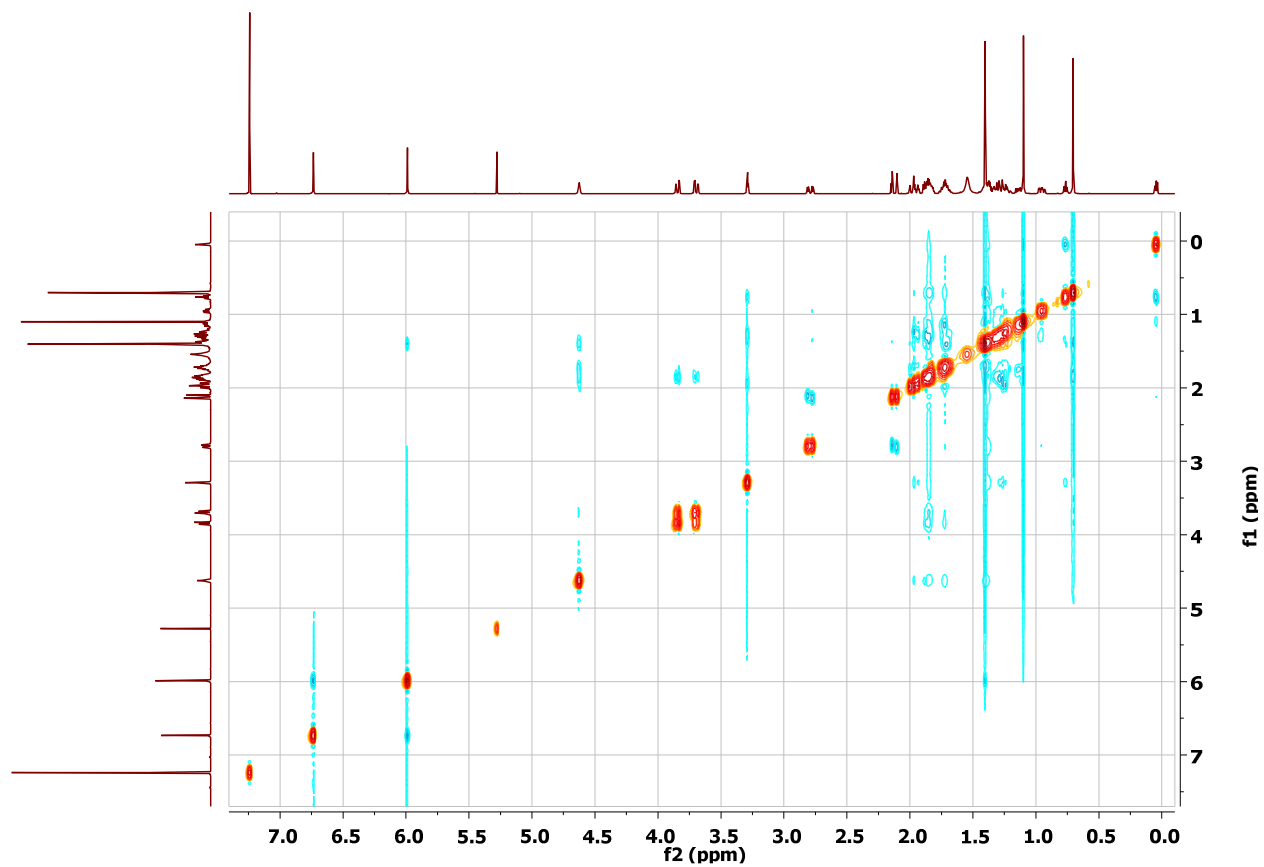

S1(f) ROESY spectrum of withawrightolide (1)
